# Supplementary material for: YAP Inhibition Alleviates Simulated Microgravity-Induced Mesenchymal Stem Cell Senescence via Targeting Mitochondrial Dysfunction
Source: MDPI journal article supplement (doi:10.3390/antiox12050990), 2023-04-24
Supplement: s1 [file s1]

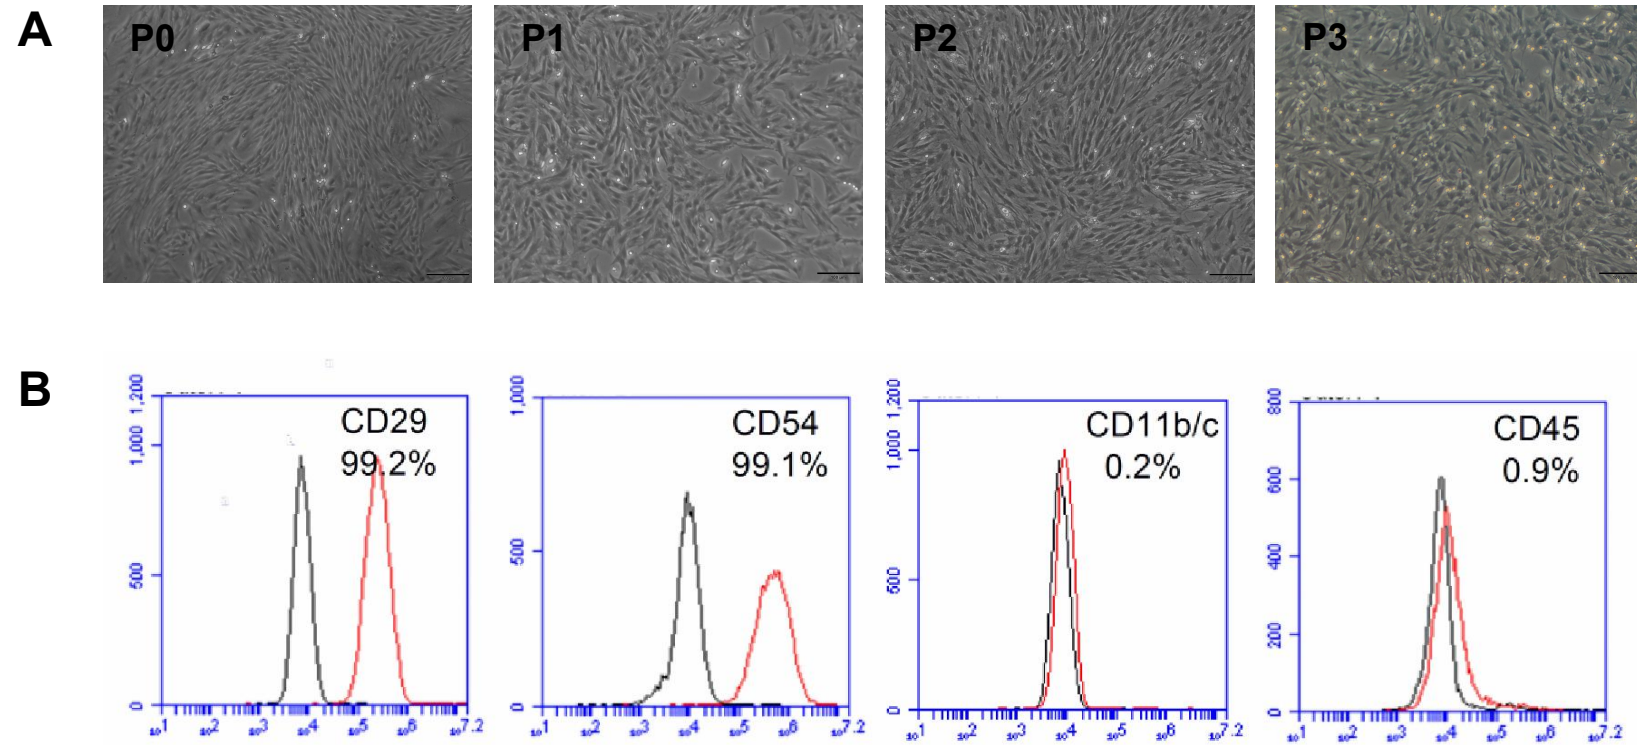

**Figure S1.** Identification of MSCs. **(A)** The P0-P3 MSCs showed a long spindle shape (bar=100  $\mu$ m). **(B)** MSCs surface antigen identification by flow cytometry. MSCs: mesenchymal stem cells; Negative antigen: CD11b/c and CD45; positive antigen: CD29 and CD54.

**A**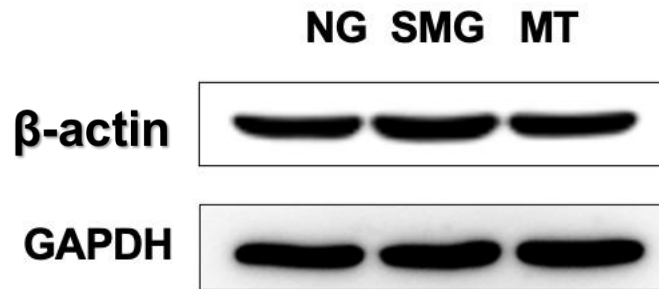**B**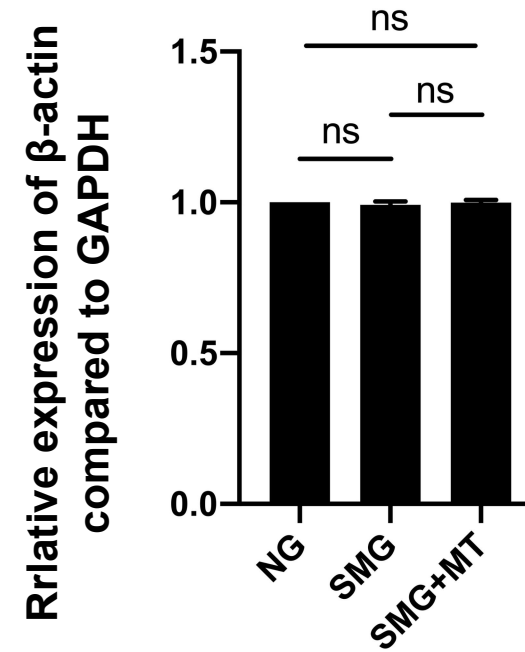

**Figure S2.** The representative image (**A**) and the quantitative analysis of the protein level expression of  $\beta$ -actin by normalizing to GAPDH(**B**). MSCs: mesenchymal stem cells; NG normal gravity; SMG simulated microgravity; MT: Mito-TEMPO;  $n=3$ , ns  $p>0.05$ .
